# The strong grip of childhood conditions in older Europeans

Gindo Tampubolon<sup>1</sup>

Maria Fajarini<sup>2</sup>

**1 Manchester Institute for Collaborative Research on Ageing  
University of Manchester**

**2 Evidence & Analytics  
Manchester**

\* [tampubolon@manchester.ac.uk](mailto:tampubolon@manchester.ac.uk)

## Abstract

Among older Europeans grip strength has been found to be marked by a disadvantaged adulthood. Across the Channel, among older Britons gait speed as another measure of physical function has been found to be marked by disadvantaged childhood. Using the Survey of Health, Ageing, and Retirement in Europe (2004-2013), we studied whether childhood poverty led to Europeans aged 50 to 104 years having a weaker grip. We then drew their trajectories of repeatedly measured grip strength to discern a steeper decline among the childhood poor. Retrospective childhood poverty some four to nine decades in the past was treated as a

latent construct following the above literature; attrition during repeated measurements is handled using inverse proportional to attrition weighting. The data showed the childhood poor to have a weaker grip for half a century in later life. However, they do not show a steeper decline. Most important, by contributing to levels of grip strength in later life, adult condition holds the potential to shape the strong and long arm of childhood condition. The results are another impetus to eliminate childhood poverty to ensure healthy ageing Europeans.

Keywords: Survey of Health, Ageing, and Retirement in Europe; childhood; grip strength

## Introduction

Physical functioning is a key driver for the wellbeing of older people, with grip strength and gait speed its two important and well-characterised markers [1]. Therefore, maintaining high levels of physical function throughout later life is singled out as an objective for public health in response to the ageing population challenge [2]. It is also important because with life expectancy at 60 years extending secularly, the welfare implication of impaired physical function in later life is considerable. Long term care of physical disabilities in later life is costly. In the Netherlands and Sweden in 2011, it costs more than 3.5% of their gross domestic products [2]. We therefore aimed to draw trajectories of physical function of Europeans aged 50 to 104 over an extended period.

Grip strength has been repeatedly shown to predict incident disability, morbidity, and mortality [3, 4]. Thus a recent study explored its predictors among Europeans aged 65 to 90 using the Survey of Health, Ageing, and

Retirement in Europe (SHARE, 2004-2013), examining the roles of  
parental occupation and individual occupation at midlife [5]. The authors  
found that grip weakens linearly with age with steeper slopes among men  
than women; similar results had been found earlier in a cross-section of  
Europeans aged 50 and older [6] and in Danes aged 46 to 102 [7]. In  
addition, men with elementary or lower occupation at midlife had a weaker  
grip at ages beyond 65, though there was no evidence that they  
experienced a steeper decline. Beyond age and sex variations, an earlier  
study of SHARE found that grip strength varied considerably across  
individual height and geographic region (north – south), advising that  
these variables should be adjusted for [6].

Another report used gait speed as a measure of physical function in its  
sister study, the English Longitudinal Study of Ageing (ELSA), appraising  
the role of an even earlier stage in life course: childhood condition [8]. The  
author found that material poverty during childhood associates with slower  
gait in Britons aged 50 to 90 years, with material poverty indicated by lack  
of essential facilities, overcrowding, and number of books in the childhood  
home, as well as financial hardship during childhood. Notably, childhood  
information was elicited retrospectively, collecting potentially inaccurate  
information [9], and requiring new methods based on latent construct to  
deal with inaccurate information [8]. Examined with the new methods, the  
data showed that childhood poverty was associated with lower levels of  
health status in later life overall: slower gait, poorer memory, and more  
depression. The mechanism invoked to link the childhood condition and  
later life emphasised the broader effects early life adversity can have. The  
results evinced the long arm of childhood condition across the spectrum of

health from physical to mental health. 42

To understand more about the long arm of childhood condition [10], 43  
four improvements can be made. First, most empirical studies are content 44  
with explaining levels of health, effectively associating a stage in childhood 45  
and a time in later life. The study of older Britons above for example 46  
explained the levels of gait speed, episodic memory, and depression by 47  
childhood condition. No attempts was made at explaining their rates of 48  
change. But surely it is more fruitful to understand whether childhood 49  
poverty puts people onto a trajectory of steeper decline. So far, the limited 50  
evidence shows no steeper decline among those with disadvantaged 51  
childhood or midlife [5]. 52

Second, with some exceptions [5,8], most empirical studies stopped at 53  
adulthood. No doubt, this is a function of available data. Although theory 54  
suggests that a disadvantaged childhood can be compensated for in 55  
adulthood and midlife such that later life health is freed from childhood 56  
condition [11], very little evidence is furnished about older people and their 57  
childhood. On the other hand, epigenetic change in early life is posited to 58  
have a stable effect well into later life [12]. Once biological imprinting has 59  
transpired through DNA methylation and histone modification, the effect 60  
of childhood condition can persist. Therefore, more empirical investigation 61  
is necessary to examine whether childhood condition reach into health 62  
trajectories in later life. 63

Third, information about childhood condition of the oldest old [13] is 64  
rarely available in prospective survey. This lack is felt more strongly if a 65  
nationally representative sample is required. ELSA collected rich 66  
information about people aged 50 years and over prospectively, except 67

when it comes to information about their childhood which was collected 68  
retrospectively. This information may not be entirely accurate. For 69  
instance, among 50 year old Britons (who had been prospectively followed 70  
since birth), when asked about the numbers of people and bedrooms in 71  
their childhood home, only one in three got both right [9]. Fortunately, 72  
new methods to work with such inaccurate retrospective information have 73  
been proposed and subsequently shown to work with these kinds of data; 74  
such methods need to be applied more often [8]. 75

Lastly, studying older people over time to draw their trajectories of 76  
physical function inevitably faces attrition problems since older people 77  
tend to attrite from a longitudinal study due to worse health 78  
function [14,15]. Recently, a number of solutions have been proposed 79  
including joint modelling and weighting [16,17]; inverse proportional to 80  
attrition weighting is applied here. 81

We therefore aimed to distinguish the roles of childhood poverty and 82  
adult condition in explaining the trajectories of grip strength of Europeans 83  
aged 50 to 104 years. To tie the four strands together, three questions are 84  
raised. Do those with a poor childhood enter later life with a weaker grip 85  
and remain so throughout? Are their grip strength trajectories also 86  
steeper? Lastly, does good condition in adulthood render negligible any 87  
disadvantage identified earlier? 88

In answering these questions, this report contributes three ideas to the 89  
literature. The arm of childhood condition is long and strong in predicting 90  
grip strength much later in life. Childhood condition can be recovered 91  
retrospectively and should be considered when explaining health outcomes 92  
of people above 50. Epigenetic changes imprinted by poverty early in life 93

may lie behind this long and strong arm of childhood condition. 94

## Materials and methods 95

The Survey of Health, Ageing, and Retirement in Europe (SHARE) is an 96  
ongoing longitudinal study of ageing in 20 countries so far [18]. Our use of 97  
this anonymised secondary research data has been approved for exemption 98  
by the ethical board of the University of Manchester. 99

As [6] we studied 11 countries, repeatedly surveyed and grouped into 100  
two regions: northern-continental (Austria, Denmark, France, Germany, 101  
the Netherlands, Sweden, Switzerland) and southern (Greece, Italy, and 102  
Spain). We used all waves (2004-2013) matched with the life course survey 103  
in 2008 following [5]. The matched sample differed from the rest in the 104  
following ways: the participants are older (67.0 vs 66.0 year, 105  
 $t = 17.5, p < 0.001$ ) and somewhat weaker (33.5 vs 34.2 kg, 106  
 $t = 12.1, p < 0.001$ ). There is a higher proportion of women to men in the 107  
analytic sample than in the excluded sample ( $\chi^2_1 = 47.7, p < 0.001$ ). 108

The outcome variable is objectively measured as the maximum grip 109  
strength of the dominant hand obtained using a dynamometer (Smedley, S 110  
Dynamometer, TTM, Tokyo, 100 kg) [6]. In contrast, childhood condition 111  
as the key exposure was retrospectively obtained. The condition concerned 112  
situation at ten years of age i.e. some four to nine decades in the past, 113  
indicating lack of the following: indoor toilet, hot and cold running water, 114  
central heating, fixed bath; plus overcrowding (more people than 115  
bedrooms) as well as number of books in the house, following [8]. 116

It is tempting to use the information unmodified, but this should be 117  
resisted. A latent construct solution to obtaining poverty status when its 118

indicators were inaccurate has been proposed [19]; a particular application 119  
has been fruitfully used on ELSA [8] as well as on the China Health and 120  
Retirement Longitudinal Study [20], sister studies of SHARE. Following 121  
this we built using latent class analysis a childhood poverty status giving 122  
poor versus non-poor class based on the indicators above. Beyond dealing 123  
with measurement error, this latent construct approach offers substantive 124  
advantages that we shall revisit in the discussion. 125

The literature on longitudinal ageing studies is keenly aware that 126  
participants tend to attrite non-randomly, hence a number of approaches 127  
have been proposed including pattern mixture [5], joint model [16,21], 128  
multilevel multiple imputation [22,23], and weighting [17,24–26]. We 129  
joined the last stream to apply inverse proportional to attrition weighting. 130  
Specifically following [26] in their study of cognition in Atherosclerosis Risk 131  
in Community study, the attrition model includes age, sex, smoking, 132  
cognition, education, hypertension, cardiovascular disease, diabetes, and 133  
retirement status; stabilised weights were then computed with a base 134  
model including age, sex, and education. 135

The trajectories are derived using mixed model, also known as latent 136  
growth or random coefficients model, which has been used for this 137  
sample [5]. We included random intercepts only because there were no 138  
meaningful variations in the random age slopes nor extensive discussion of 139  
this in the literature [5,7], retaining the virtue of parsimony [27]. Instead 140  
of positing that, *ceteris paribus*, the trajectories change randomly as age 141  
unfolds, we posited that they change systematically i.e. the childhood poor 142  
have a steeper decline. 143

We explored new factors unexamined in previous work on longitudinal 144

trajectories of grip strength in SHARE. Social inequality in morbidities in 145  
later life is well documented, and this suggests inclusion of markers of 146  
socioeconomic position and marital status. Log of household income with 147  
purchasing power parity exchange rate, education (ISCED three levels: less 148  
than high school as reference, high school, and college or higher), 149  
occupation (ISCO three levels: elementary as reference, managerial or 150  
professional, and others), and marital status (fourfold: never married as 151  
reference, married or in partnership, separated or divorced, widowed). We 152  
included two markers of disadvantaged adult condition: following [5], adult 153  
occupational position (elementary occupation or not), and following [8], 154  
adult illness period. 155

Poverty class as derived above is one of the covariates. Because this is a 156  
derived latent class instead of an observed variable, adjustment to 157  
standard errors was made following a new method proposed by Vermunt 158  
and colleagues [28–30]. 159

To answer the research questions, we built four models separately for 160  
men and women following [5–7]. The level model showed childhood poverty 161  
association with levels of grip strength, the slope model additionally 162  
showed association with the slope of annual decline by interacting poverty 163  
with age, while the alternative adult model showed, instead of the 164  
interaction term, additional adult condition associations. Lastly, the 165  
complete model includes them all. Modelling is done in Latent GOLD 166  
5.1 [31] with model fit judged using Bayes-Schwarz information criterion of 167  
the smallest being best. 168



## Results

169

Women made up the majority of the sample (37,756, 55.6%) which has the  
average age of 66.9 years (standard deviation [SD]: 9.7 years). Women  
have weaker maximum grip: 26.0 kg (SD: 7.1 kg) compared to men: 42.6  
kg (SD: 10.4 kg). The average of the maximum grip strength among  
northern-continental Europeans is (34.8 kg, SD: 12.0) while among  
southern Europeans is (31.2 kg, SD: 11.7 kg). The sample is further  
summarised in Table 1.

170

171

172

173

174

175

176

The latent class analysis of childhood poverty revealed that 45.9% of  
the participants had a poor childhood at age ten (Table 2). The indicators  
of childhood condition showed plausible loadings. For instance, lacking  
more facilities is positively loaded on being a poor child while having more  
books is negatively loaded on being a poor child.

177

178

179

180

181

As women are found to have lower levels of grip strength than men, we  
presented their grip strength trajectories separately. The best model based  
on BIC is the adult model for both. Information criteria and key  
coefficients for both models are put together in Table 3 and discussed each  
in turn, putting complete information criteria (Supplement Table 4) and  
complete coefficients (Supplement Table 5) in the Supplement.

182

183

184

185

186

187

As has been widely documented, men have stronger grip (higher  
intercepts) but have steeper annual decline (418 versus 303 gram). Both  
slopes are significant ( $p < 0.001$ ) and gentler than the estimates for the  
Danes [7]. Individual height and geographic region are also significant, in  
accordance with the literature [6]. Adult illness, a marker of adult  
condition, inversely associates with grip strength throughout; and so is  
being employed as elementary worker, which accords with [5]. Despite the

188

189

190

191

192

193

194

**Table 1. Description of the analytic sample (SHARE 2002-2013)**

| Variable                  | Women            |                | Men              |                |
|---------------------------|------------------|----------------|------------------|----------------|
|                           | Mean or <i>N</i> | Std. dev. or % | Mean or <i>N</i> | Std. dev. or % |
| Grip strength             | 25.996           | 7.059          | 42.625           | 10.375         |
| Age                       | 66.836           | 10.029         | 67.042           | 9.338          |
| Height                    | 162.218          | 6.611          | 173.684          | 7.465          |
| Married                   | 24,361           | 64.52          | 24,511           | 81.22          |
| Single                    | 2,112            | 5.59           | 1,827            | 6.05           |
| Sep/divorced              | 3,252            | 8.61           | 1,949            | 6.46           |
| Widowed                   | 8,031            | 21.27          | 1,892            | 6.27           |
| Elementary occ.           | 996              | 2.64           | 539              | 1.79           |
| Intermediate              | 36,068           | 95.53          | 28,574           | 94.68          |
| Professional              | 692              | 1.83           | 1,066            | 3.53           |
| Primary or less           | 14,185           | 37.57          | 9,284            | 30.76          |
| High School               | 17,031           | 45.11          | 14,155           | 46.90          |
| College                   | 6,540            | 17.32          | 6,740            | 22.33          |
| Household income          | 21,820           | 60,656         | 25,629           | 47,118         |
| Adult illness: none       | 30,181           | 80.28          | 24,839           | 82.52          |
| One                       | 5,052            | 13.44          | 3,849            | 12.79          |
| Two                       | 1,022            | 2.72           | 734              | 2.44           |
| Three                     | 378              | 1.01           | 198              | 0.66           |
| More than three           | 577              | 1.53           | 252              | 0.84           |
| Most adulthood            | 384              | 1.02           | 230              | 0.76           |
| Adult elementary occ.: no | 27,644           | 73.22          | 21,060           | 69.78          |
| Yes                       | 10,112           | 26.78          | 9,119            | 30.22          |
| North                     | 23,259           | 61.60          | 18,525           | 61.38          |
| South                     | 14,497           | 38.40          | 11,654           | 38.62          |
| Lack facility: none       | 6,580            | 17.43          | 5,466            | 18.11          |
| 1                         | 3,999            | 10.59          | 3,012            | 9.98           |
| 2                         | 3,475            | 9.20           | 2,708            | 8.97           |
| 3                         | 5,691            | 15.07          | 4,560            | 15.11          |
| 4                         | 7,786            | 20.62          | 6,270            | 20.78          |
| Lack all five             | 10,225           | 27.08          | 8,163            | 27.05          |
| Num. books: none/very few | 17,103           | 45.78          | 13,794           | 46.13          |
| One shelf                 | 7,910            | 21.17          | 6,230            | 20.83          |
| One bookcase              | 7,419            | 19.86          | 5,994            | 20.04          |
| Two bookcases             | 2,483            | 6.65           | 1,870            | 6.25           |
| Three or more             | 2,442            | 6.54           | 2,016            | 6.74           |
| Over-crowded: no          | 10,103           | 26.76          | 8,312            | 27.54          |
| Yes                       | 27,653           | 73.24          | 21,867           | 72.46          |

**Table 2. Latent classes of poor and non-poor childhood.**

| Indicator       | Non-poor | Poor   |
|-----------------|----------|--------|
| Size            | 54.1%    | 45.9%  |
| Over-crowded    |          |        |
| No              | 0.4384   | 0.0597 |
| Yes             | 0.5616   | 0.9403 |
| Lack facility   |          |        |
| None            | 0.2418   | 0.0116 |
| 1               | 0.1782   | 0.0228 |
| 2               | 0.1709   | 0.0567 |
| 3               | 0.1686   | 0.1398 |
| 4               | 0.1334   | 0.2673 |
| Lack all five   | 0.1071   | 0.5019 |
| Number of books |          |        |
| None/very few   | 0.2156   | 0.7091 |
| One shelf       | 0.2377   | 0.2104 |
| One bookcase    | 0.3245   | 0.0729 |
| Two bookcases   | 0.1093   | 0.0061 |
| Three or more   | 0.1129   | 0.0016 |

**Table 3. Mixed models of trajectories of grip strength (adjusting for household income, occupation, education, and marital status); SE: standard error. Source: SHARE 2004-2013.**

| Covariate                   | Women   |        |          | Men     |        |          |
|-----------------------------|---------|--------|----------|---------|--------|----------|
|                             | coef    | SE     | <i>p</i> | coef    | SE     | <i>p</i> |
| Intercept                   | 28.1459 | 3.7292 | < 0.001  | 53.7396 | 3.3773 | < 0.001  |
| Age                         | -0.3028 | 0.0100 | < 0.001  | -0.4184 | 0.0112 | < 0.001  |
| Height                      | 0.0926  | 0.0212 | < 0.001  | 0.1303  | 0.0188 | < 0.001  |
| Southern Europe             | -2.7182 | 0.2662 | < 0.001  | -2.5454 | 0.2862 | < 0.001  |
| Adult illness               | -0.3664 | 0.0780 | < 0.001  | -0.6170 | 0.1445 | < 0.001  |
| Adult elementary occupation | -0.3857 | 0.0934 | < 0.001  | -0.7460 | 0.0801 | < 0.001  |
| Poor childhood              | -1.1932 | 0.2370 | < 0.001  | -2.1917 | 0.2189 | < 0.001  |
| BIC                         | 359347  |        |          | 1990012 |        |          |

strong effects of adult condition, the childhood-poor Europeans still have 195  
weaker grip in their later lives: men by 2.19 kg and women by 1.19 kg. In 196  
summary, the coefficients are plotted in Figure 1 to help in making 197  
comparison, and the trajectories of predicted grip strength for men and 198  
women who were childhood-poor and otherwise are drawn in Figure 2. 199

**Figure 1. Plots of key coefficients for women (left pane) and men (right pane).**

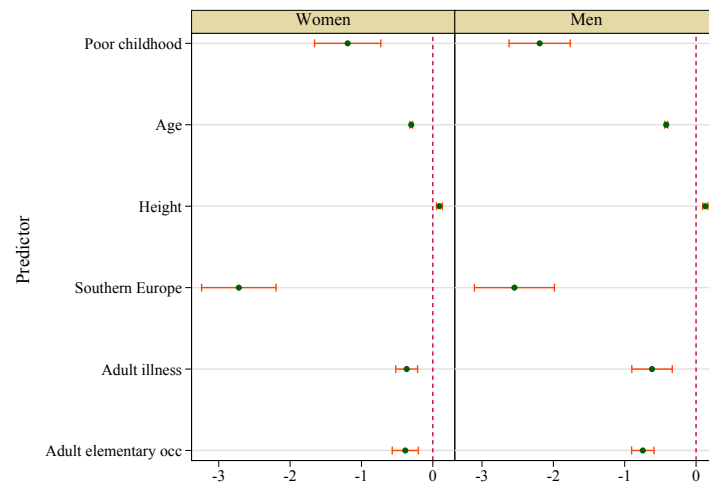

## Discussion

Maintaining higher levels of grip strength is key, since it is a core 200  
component to avoid frailty and sarcopenia and ensure healthy ageing and 201  
wellbeing of older people. Here is the first evidence that being poor in life's 202  
first decade goes with weaker grip in life's last five decades. 203  
204

Beyond covering a more extended age group than recent studies [5, 8], 205  
our study confirmed that adult condition (elementary occupation or ill 206  
health in adulthood) is associated with a weaker grip. These results are 207

**Figure 2. Predicted trajectories of grip strength, distinguished by childhood poverty status for women (left pane) and men (right pane).**

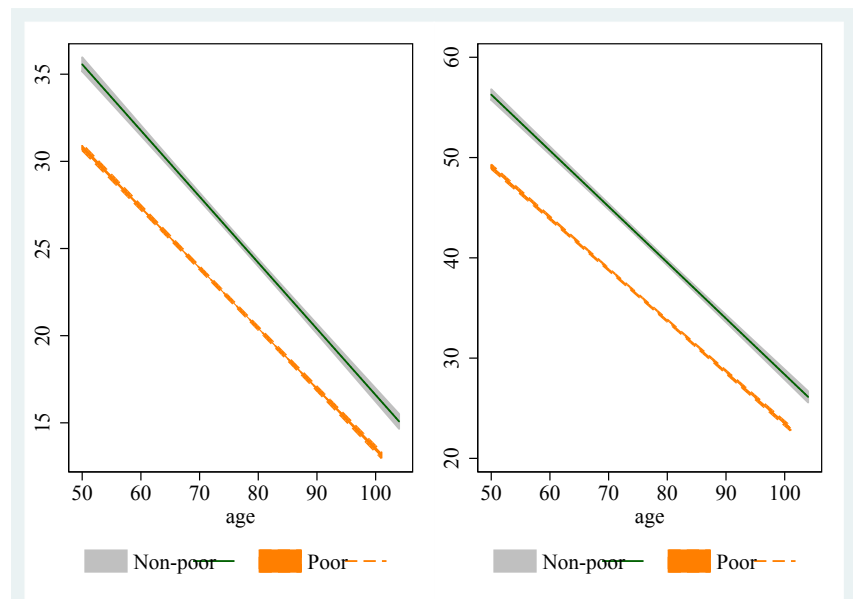

robust to inaccuracies in the measurement of childhood condition and to 208  
the attrition so common in longitudinal ageing studies. The results on the 209  
associations of childhood and adulthood conditions are strengthened 210  
because other factors have been accounted for including household income, 211  
education, occupational class, and marital status [32, 33]. In short, 212  
excepting the question about a steeper decline, the results supplied 213  
affirmative answers to all our questions: both childhood poverty and 214  
adulthood disadvantage go hand in hand with a weaker grip in later life. 215

Such long range results can be underpinned by a biosocial mechanism, 216  
especially with chronic inflammation playing a major role [34]. Older age 217  
is often marked by chronic or low grade inflammation which can impair 218  
muscle function. In turn, inflammation itself can be upregulated as a result 219  
of childhood adversity. The mechanism therefore has two major steps: [i] 220

childhood adversity to lifetime inflammation, and [ii] inflammation 221  
disrupting myogenic processes of regeneration and functioning. We take 222  
each in turn. 223

Epigenetic literature has been accumulating evidence using animal 224  
models, such as mice, rats, and macaques, to examine whether early life 225  
adversity imprints epigenetic changes (DNA methylation and histone 226  
modification) to otherwise similar genotypes, resulting in different 227  
phenotypic response [34,35]. Childhood poverty, pointing to broader early 228  
life adversity, entails more than just material lack but includes social 229  
deprivation when parents' nurturing is compromised due to their time 230  
being absorbed in providing for household members and making ends meet. 231

Therefore animal models capable of reflecting some of the complexity of 232  
material and social deprivation are uniquely revealing, especially macaques 233  
studies. They have been used in a randomised design (of parental caring of 234  
frequent versus infrequent licking or grooming) to study the causal effect of 235  
early life deprivation on DNA methylation [36,37]. The study found stable 236  
and organised epigenetic changes, involving genes in the pathways of the 237  
immune system and the hypothalamic pituitary adrenal (HPA) axis 238  
responsible for responding to stress. The peripheral immune system 239  
interacts with the HPA axis and has a role in brain function; evidence 240  
consistent with this interaction has been shown in this sample in our 241  
previous work [38]. 242

A key gene for regulating the HPA axis function, the glucocorticoid 243  
receptor (*NR3C1*), is activated in the hypothalamus in response to stress 244  
and releases glucocorticoid. Glucocorticoid receptor is differentially 245  
expressed according to the experience of social deprivation, by epigenetic 246

programming through histone acetylation and DNA methylation of the 247  
exon 1<sub>F</sub>. This epigenetic programming differentiates similar DNA 248  
sequences phenotypically, resulting in blunted feedback by glucocorticoid 249  
and heightened stress response and demodulated immune system response, 250  
a pattern that is stable throughout the life course. The bidirectional 251  
interaction between the HPA axis and the immune system facilitates the 252  
imprinting of childhood adversity through epigenetic changes. This can 253  
lead to chronic inflammation that is stable through later life as reflected in 254  
higher levels of circulating tumour necrosis factor- $\alpha$  (TNF- $\alpha$ ). 255

By discussing the role of inflammatory cytokines such as TNF- $\alpha$ , the 256  
literature on muscle regeneration and muscle function has provided 257  
evidence to complete the mechanism. Inflammation is known to impair 258  
both muscle regeneration and muscle functioning. In normal activities of 259  
daily living which involve muscle exertion, some minute damage to muscle 260  
tissue may occur [39]. In these circumstances, the pluripotent myosatellite 261  
cells respond by proliferating and differentiating to form muscle fibres and 262  
cover the damaged tissue. But circulating inflammatory cytokines such as 263  
TNF- $\alpha$  have been shown to impair this process of regeneration in two ways: 264  
apoptosis of myoblasts [40] and inhibition of the differentiation stage, 265  
leaving proliferated cells unable to differentiate and replace the damaged 266  
tissue [41]. Beyond impairing the myogenesis process in common minute 267  
damage, inflammation also impairs functioning by reducing the power of 268  
the single permeable fibre [42]. So in mice, TNF- $\alpha$  rapidly reduces the 269  
force generating capacity or specific tension of muscle fibres independent of 270  
loss of muscle volume [43]. 271

In short, inflammation impairs muscle functioning in older people at 272

least along three points: it encourages myosatellite cell deaths [44], it 273  
interrupts the step of differentiation into myonuclei and muscle fibres; 274  
lastly, even if muscle fibres were successfully regenerated, inflammation 275  
reduces the febrile tensile strength. Childhood poverty, through 276  
upregulating inflammation, impairs grip strength in later life. 277

This study has a number of weaknesses. First, by matching only 278  
individuals with childhood information with those with longitudinal 279  
observations, inevitably some unmatched observations were set aside. It is 280  
impossible to measure the direction of possible bias this might entail. 281  
Second, although epigenetic changes are posited to be the mechanism, 282  
there is no direct evidence of the extent of DNA methylation in the sample. 283  
This is a potentially rectifiable weakness. Despite these weaknesses, this 284  
study has some strengths. First, the sample is designed to represent the 285  
countries and not only some clinical groups or cities, hence facilitating 286  
generalisation. Finally, this study is also the first to link broad childhood 287  
condition (subject to recall error) with later life trajectories (subject to 288  
attrition), reinforcing sustained links across the life course. 289

As alluded to above, besides uncovering the strong results on childhood 290  
poverty, the method with which childhood poverty is constructed i.e. as a 291  
latent class of poverty, holds potential to advance research work on the life 292  
course and health. It is useful to call to mind that childhood information, 293  
such as a lack of the five facilities above, can be used alternatively as (i) 294  
indicators of a latent factor in factor analysis or (ii) five additional 295  
covariates. Now the use of a latent class of poverty facilitates discussion, 296  
for instance when presenting whether the childhood poor (compared to the 297  
non-poor) show better health outcomes in later life. On the other hand, 298



with the latent factor we have to compare those on one standard deviation 299  
away from the mean against those on the mean of the latent factor. This is 300  
hardly intuitive. Or with five additional covariates, we are led to scrutinise 301  
each effect which makes discussion potentially unwieldy. 302

Second, a latent class is also easier to use when testing a hypothesis of a 303  
steeper decline; it simply needs an interaction term (of poverty class and 304  
age). The interpretation will be similarly intuitive: the childhood poor 305  
declined more steeply by a certain kg (the coefficient) per year if the 306  
interaction term was found significantly negative. On the other hand, 307  
although with the latent factor a similar interaction can be used, there 308  
remains the attendant difficulty of interpretation. Or with five additional 309  
covariates, we are required to use five interaction terms. Depending on the 310  
choice, interpretation may be hindered. 311

Most important, a latent class enables cross-country comparison. It is 312  
conceivable that the long arm of childhood condition hypothesis may be 313  
tested in other countries, for example in equatorial developing countries 314  
where lack of running hot water or central heating may not hold similar 315  
salience. Without these indicators, nevertheless, poverty class can still be 316  
constructed with this method and the hypothesis tested. In this way, 317  
latent class of childhood poverty based on retrospective information should 318  
always be considered in life course and ageing investigation anywhere in 319  
the world. 320

In conclusion, although childhood and adulthood conditions last a 321  
lifetime [12], there is a potential role for interventions in adulthood both in 322  
the labour market and the health sector. On the basis of evidence 323  
uncovered here, childhood could be a critical period to stave costly long 324

term care. It is never too early to invest in later life.

## Acknowledgments

This work was supported by grants from the Medical Research Council and Economic & Social Research Council (No. G1001375/1), the National Institute of Health Research (No. ES/L001772/1) and the European Union's Horizon 2020 Research and Innovation Programme (No. 668648) to Gindo Tampubolon.

This paper used data from SHARE Waves 1, 2, 3 (SHARELIFE), 4 and 5 (DOIs: 10.6103/SHARE.w1.500, 10.6103/SHARE.w2.500, 10.6103/SHARE.w3.500, 10.6103/SHARE.w4.500, 10.6103/SHARE.w5.500), see Börsch-Supan et al. (2013) for methodological details. The SHARE data collection has been primarily funded by the European Commission through the FP5 (QLK6-CT-2001-00360), FP6 (SHARE-I3: RII-CT-2006-062193, COMPARE: CIT5-CT-2005-028857, SHARELIFE: CIT4-CT-2006-028812) and FP7 (SHARE-PREP: No. 211909, SHARE-LEAP: No. 227822, SHARE M4: No. 261982). Additional funding from the German Ministry of Education and Research, the U.S. National Institute on Aging (U01\_AG09740-13S2, P01\_AG005842, P01\_AG08291, P30\_AG12815, R21\_AG025169, Y1-AG-4553-01, IAG\_BSR06-11, OGHA\_04-064) and from various national funding sources is gratefully acknowledged (see [www.share-project.org](http://www.share-project.org))

**Table 4. Supplement Table 4 Model comparisons.**

| Model                   | BIC     |
|-------------------------|---------|
| Male: level             | 2012538 |
| Male: slope             | 2008427 |
| Male: adult condition   | 1990012 |
| Male: all               | 2007423 |
| Female: level           | 376341  |
| Female: slope           | 369201  |
| Female: adult condition | 359347  |
| Female: all             | 363772  |

**Table 5. Supplement Table 5 Models with adult condition for women (left pane) and men (right pane)**

| Covariate             | Women   |        |          | Men     |        |          |
|-----------------------|---------|--------|----------|---------|--------|----------|
|                       | coef    | SE     | <i>p</i> | coef    | SE     | <i>p</i> |
| Intercept             | 28.1459 | 3.7292 | < 0.001  | 53.7396 | 3.3773 | < 0.001  |
| Poor childhood        | -1.1932 | 0.2370 | < 0.001  | -2.1917 | 0.2189 | < 0.001  |
| Age                   | -0.3028 | 0.0100 | < 0.001  | -0.4184 | 0.0112 | < 0.001  |
| Log household income  | 0.1375  | 0.0026 | < 0.001  | 0.1633  | 0.0148 | < 0.001  |
| High school           | 2.2142  | 0.2716 | < 0.001  | 1.9144  | 0.2723 | < 0.001  |
| College               | 5.5721  | 0.3256 | < 0.001  | 10.2978 | 0.5578 | < 0.001  |
| Intermediate          | 1.7347  | 0.1905 | < 0.001  | -1.8704 | 0.3893 | < 0.001  |
| Managerial            | 3.7451  | 0.3295 | < 0.001  | 0.2778  | 0.5475 | 0.61     |
| Married               | 1.9782  | 0.3128 | < 0.001  | -2.1077 | 0.4301 | < 0.001  |
| Sep/divorced          | 4.7904  | 0.7347 | < 0.001  | 4.3090  | 0.3546 | < 0.001  |
| Widowed               | 2.0289  | 0.3310 | < 0.001  | -3.5030 | 0.5218 | < 0.001  |
| Height                | 0.0926  | 0.0212 | < 0.001  | 0.1303  | 0.0188 | < 0.001  |
| Southern Europe       | -2.7182 | 0.2662 | < 0.001  | -2.5454 | 0.2862 | < 0.001  |
| Adult illness period  | -0.3664 | 0.0780 | < 0.001  | -0.6170 | 0.1445 | < 0.001  |
| Adult elementary work | -0.3857 | 0.0934 | < 0.001  | -0.7460 | 0.0801 | < 0.001  |
| $\sigma^2$            | 4.1348  | 0.0805 | < 0.001  | 4.1061  | 0.0940 | < 0.001  |

## Supplement Table 4 and 5

## References

1. Dodds RM, Syddall HE, Cooper R, Benzeval M, Deary IJ, Dennison EM, et al. Grip strength across the life course: Normative data from twelve British studies. PLoS ONE. 2014 12;9(12):1–15.

2. WHO. World Report on Ageing and Health. Geneva: WHO; 2015.  
Available from:  
[www.who.int/ageing/publications/world-report-2015/](http://www.who.int/ageing/publications/world-report-2015/).
3. Sasaki H, Kasagi F, Yamada M, Fujita S. Grip strength predicts cause-specific mortality in middle-aged and elderly persons. *The American Journal of Medicine*. 2007;120(4):337 – 342.
4. Cooper R, Kuh D, Cooper C, Gale CR, Lawlor DA, Matthews F, et al. Objective measures of physical capability and subsequent health: a systematic review. *Age and Ageing*. 2011;40(1):14–23.
5. Kröger H, Fritzell J, Hoffmann R. The association of levels of and decline in grip strength in old age with trajectories of life course occupational position. *PLoS ONE*. 2016;p. e0155954.
6. Andersen-Ranberg K, Petersen I, Frederiksen H, Mackenbach JP, Christensen K. Cross-national differences in grip strength among 50+ year-old Europeans: results from the SHARE study. *European Journal of Ageing*. 2009;6(3):227–236.
7. Frederiksen H, Hjelmberg J, Mortensen J, McGue M, Vaupel JW, Christensen K. Age trajectories of grip strength: Cross-sectional and longitudinal data among 8,342 Danes aged 46 to 102. *Annals of Epidemiology*. 2006;16(7):554–562. Available from:  
<http://dx.doi.org/10.1016/j.annepidem.2005.10.006>.
8. Tampubolon G. Growing up in poverty, growing old in infirmity: The long arm of childhood conditions in Great Britain. *PLoS ONE*. 2015 12;10(12):1–16.

9. Brown M. Assessing recall of early life circumstances: evidence from the National Child Development Study. *Longitudinal and Life Course Studies*. 2014;5(1):64–78.
10. Hayward MD, Gorman BK. The long arm of childhood: The influence of early-life social conditions on men’s mortality. *Demography*. 2004;41(1):87–107.
11. Shanahan MJ, Mortimer JT, Johnson MK, editors. *Handbook of the Life Course*. New York: Springer; 2016.
12. Szyf M. How do environments talk to genes? *Nat Neurosci*. 2013 Jan;16(1):2–4. Available from: <http://dx.doi.org/10.1038/nn.3286>.
13. Suzman RM, Willis DP, Manton KG, editors. *The Oldest Old*. Oxford: Oxford University Press; 1992.
14. Newman AB. An overview of the design, implementation, and analyses of longitudinal studies on aging. *Journal of the American Geriatrics Society*. 2010;58(S2):S287–S291.
15. Hardy SE, Allore H, Studenski SA. Missing data: A special challenge in aging research. *Journal of the American Geriatrics Society*. 2009;57(4):722–729.
16. Tampubolon G. Cognitive ageing in Great Britain in the new century: Cohort differences in episodic memory. *PLoS ONE*. 2016 12;10(12):1–17.

17. Tampubolon G. Trajectories of the healthy ageing phenotype among middle-aged and older Britons, 2004-2013. *Maturitas*. 2016;88(7):9 – 15.
18. Börsch-Supan A, Brandt M, Hunkler C, Kneip T, Korbmacher J, Malter F, et al. Data Resource Profile: The Survey of Health, Ageing and Retirement in Europe (SHARE). *International Journal of Epidemiology*. 2013; Available from: <http://ije.oxfordjournals.org/content/early/2013/06/18/ije.dyt088.abstract>.
19. Breen R, Moisisio P. Poverty dynamics corrected for measurement error. *The Journal of Economic Inequality*. 2004;2(3):171–191. Available from: <http://dx.doi.org/10.1007/s10888-004-3227-9>.
20. Yang F, Lou V. Childhood adversities, urbanisation and depressive symptoms among middle-aged and older adults: evidence from a national survey in China. *Ageing and Society*. 2016;36(5):1031–1051.
21. Tampubolon G. Delineating the Third age: Joint models of older people's quality of life and attrition in Britain 2002-2010. *Aging & Mental Health*. 2015;19:576–583. Available from: <http://dx.doi.org/10.1080/13607863.2014.1003279>.
22. Romaniuk H, Patton GC, Carlin JB. Multiple imputation in a longitudinal cohort study: A case study of sensitivity to imputation methods. *American Journal of Epidemiology*. 2014;.

23. Kalaycioglu O, Copas A, King M, Omar RZ. A comparison of multiple-imputation methods for handling missing data in repeated measurements observational studies. *Journal of the Royal Statistical Society: Series A (Statistics in Society)*. 2016;179(3):683–706. Available from: <http://dx.doi.org/10.1111/rssa.12140>.
24. Cole SR, Hernán MA. Constructing inverse probability weights for marginal structural models. *American Journal of Epidemiology*. 2008;168(6):656–664.
25. Hernán MA, Brumback B, Robins JM. Marginal structural models to estimate the causal effect of zidovudine on the survival of HIV-positive men. *Epidemiology*. 2000;11(5):561–570.
26. Gottesman RF, Rawlings AM, Sharrett AR, Albert M, Alonso A, Bandeen-Roche K, et al. Impact of differential attrition on the association of education with cognitive change over 20 years of follow-up: The ARIC Neurocognitive Study. *American Journal of Epidemiology*. 2014;179(8):956–966.
27. Box GEP. Some problems of statistics and everyday life. *Journal of the American Statistical Association*. 1979;74(365):1–4.
28. Vermunt JK. Latent class modeling with covariates: Two improved three-step approaches. *Political Analysis*. 2010;18(4):450–469.
29. Bakk Z, Tekle FB, Vermunt JK. Estimating the association between latent class membership and external variables using bias-adjusted three-step approaches. *Sociological Methodology*. 2013;43(1):272–311.



30. Bakk Z, Oberski DL, Vermunt JK. Relating latent class assignments to external variables: Standard errors for correct inference. *Political Analysis*. 2014;22(4):520–540.
31. Vermunt JK, Magidson J. *Upgrade Manual for Latent GOLD 5.1*. Belmont, MA: Statistical Innovations; 2016.
32. Deaton A. *The Great Escape: health, wealth, and the origins of inequality*. Princeton, NJ: Princeton University Press; 2013.
33. Marmot M. *The Health Gap: The Challenge of an Unequal World*. London: Bloomsbury; 2015.
34. McGowan PO, Sasaki A, D'Alessio AC, Dymov S, Labonte B, Szyf M, et al. Epigenetic regulation of the glucocorticoid receptor in human brain associates with childhood abuse. *Nat Neurosci*. 2009 Mar;12(3):342–348. Available from: <http://dx.doi.org/10.1038/nn.2270>.
35. Weaver ICG, Cervoni N, Champagne FA, D'Alessio AC, Sharma S, Seckl JR, et al. Epigenetic programming by maternal behavior. *Nature Neuroscience*. 2004;7(8):847–854.
36. Liu D, Diorio J, Tannenbaum B, Caldji C, Francis D, Freedman A, et al. Maternal care, hippocampal glucocorticoid receptors, and Hypothalamic-Pituitary-Adrenal responses to stress. *Science*. 1997;277(5332):1659–1662.
37. Szyf M. The early-life social environment and DNA methylation. *Clinical Genetics*. 2012;81(4):341–349. Available from: <http://dx.doi.org/10.1111/j.1399-0004.2012.01843.x>.

38. Tampubolon G. Repeated systemic inflammation was associated with cognitive deficits in older Britons. *Alzheimer's & Dementia: Diagnosis, Assessment & Disease Monitoring*. 2016;3:1 – 6.
39. Degens H. The role of systemic inflammation in age-related muscle weakness and wasting. *Scandinavian Journal of Medicine & Science in Sports*. 2010;20(1):28–38.
40. Saini A, Al-Shanti N, Faulkner SH, Stewart CE. Pro- and anti-apoptotic roles for IGF-I in TNF-alpha-induced apoptosis: A MAP kinase mediated mechanism. *Growth Factors*. 2008;26(5):239–253.
41. Langen RCJ, Schols AMWJ, Kelders MCJM, van der Velden JLJ, Wouters EFM, Janssen-Heininger YMW. Muscle wasting and impaired muscle regeneration in a murine model of chronic pulmonary inflammation. *American Journal of Respiratory Cell and Molecular Biology*. 2006;35(6):689–696. Available from: <http://www.atsjournals.org/doi/abs/10.1165/rcmb.2006-01030C>.
42. Hardin BJ, Campbell KS, Smith JD, Arbogast S, Smith J, Moylan JS, et al. TNF-alpha acts via TNFR1 and muscle-derived oxidants to depress myofibrillar force in murine skeletal muscle. *Journal of Applied Physiology*. 2008;104(3):694–699. Available from: <http://jap.physiology.org/content/104/3/694>.
43. Supinski GS, Callahan LA. Caspase activation contributes to endotoxin-induced diaphragm weakness. *Journal of Applied Physiology*. 2006;100(6):1770–1777.

44. Jejuri SS, Henkelman EA, Cederna PS, Marcelo CL, Urbanchek MG, Jr WMK. Aging increases the susceptibility of skeletal muscle derived satellite cells to apoptosis. *Experimental Gerontology*. 2006;41(9):828 – 836.
